# Supplementary material for: Role of Tumor Mutation Burden Analysis in Detecting Lynch Syndrome in Precision Medicine: Analysis of 2,501 Japanese Cancer Patients
Source: Oxford University Press journal article supplement (doi:10.1158/1055-9965.epi-20-0694), 2020-10-12
Supplement: 10559965epi200694-sup-242916_3_supp_6569220_qgjz89.xlsx [file 10559965epi200694-sup-242916_3_supp_6569220_qgjz89.xlsx]

## Sheet: Table A1
Supplementary Table 1. Genetic analysis results in cases of colorectal and small intestine cancers with hTMB.
Case No.	Gender	Age (y.o)	Amsterdam II criteria	Revised Bethesada criteria	TMB (/Mb)	No. of somatic exonic mutation	Somatic MLH1 expression	Somatic mutation							MSI	IHC of MMR protein				Germline MMR
								POLE (exonuclease domain 86-427)	POLD1 (exonuclease domain 130-477)	MLH1	MSH2	MSH6	PMS2	BRAF		MLH1	MSH2	MSH6	PMS2	Detected variant	Allele frequency in control population	Pathogenicity of variant
																						ClinVar	HGMD	ACMG GL
C-1	F	38	No	Yes	409.176	13411	0.879637	p.P286R	-	p.F626L	p.E483*	p.E807K	-	-	MSS	+	+	+	+
C-2	M	46	No	Yes	327.74	10457	0.168271	p.P286R	p.D402N	-	p.E467*	p.E908* p.R922Q	-	-	MSS	+	+	+	+
C-3	M	42	No	Yes	164.731	5601	0.294791	p.P286R	-	-	-	-	-	-	MSS	+	+	+	+
C-4	F	74	No	No	162.34	5371	-1.82534	-	p.R454H	p.N535K	-	-	-	p.V600E	Disagree#
C-5	M	48	No	Yes	148.888	4764	-0.550498	p.P286R	-	-	-	p.R361H	-	-	MSS	+	+	+	+
C-6	M	41	No	Yes	119.503	3960	-0.312619	p.P286R	-	-	-	-	-	-	MSS	+	+	+	+
C-7	M	32	No	Yes	114.513	3703	0.544035	p.P286R	-	-	p.K918N	-	p.K399T	-	MSS	+	+	+	+
C-8	M	68	No	No	104.908	3505	N/A	-	-	-	-	p.Q1146fs	-	-	Uncontacted¶
C-9	M	74	No	No	98.2365	3301	-0.297575	-	-	-	-	p.E546fs	-	-	MSI-H	+	±	-	+	MSH6 p.E376*	NR	NR	NR	P
C-10	F	75	Yes	Yes	102.803	3213	0.265748	-	-	-	-	-	-	-	Uncontacted
C-11	F	78	No	No	94.7275	3109	-0.0017548	-	-	-	p.R406* +LOH†	LOH	-	-	MSI-H	+	-	-	+	Disagree
C-12	M	61	No	Yes	91.2113	3091	-1.75189	-	p.T473M	-	-	-	-	-	MSI-H	+	+	+	-	MLH1 exon13-19 del	NR	NR	DM	P
C-13	M	72	No	No	86.674	2863	-0.648439	-	-	-	p.R621*	-	p.I584N	-	MSI-H	+	-	-	+	before target sequence
C-14	F	81	No	No	82.7655	2732	-2.46591	-	-	-	-	-	-	p.V600E	Uncontacted
C-15	M	88	No	Yes	71.4898	2402	N/A	p.S297Y	-	-	-	-	-	-	MSS	+	+	+	+
C-16	M	48	No	Yes	65.2704	2186	0.333293	-	-	-	-	p.A1268fs	-	-	MSI-H	+	+	-	+	MSH6 p.R482*	0.0001	P	DM	P
C-17	M	64	No	No	60.5099	2048	0.189038	-	-	p.G232*	-	-	-	-	MSI-H	-	+	+	-	No mutation detected
C-18	M	68	No	No	59.7529	2004	-2.87388	-	-	p.A410T	-	-	-	p.V600E	Uncontacted
C-19	M	87	No	No	58.8008	1984	-1.02869	-	-	-	-	-	-	p.V600E	Uncontacted
C-20	F	77	No	No	59.1428	1968	N/A	-	-	-	-	-	-	p.V600E	Uncontacted
C-21	F	81	No	No	55.0845	1867	-3.22375	-	-	-	-	-	-	p.V600E	Uncontacted
C-22	M	69	No	No	52.4405	1773	-3.15891	p.K391T	-	-	-	-	-	p.V600E	Uncontacted
C-23	F	88	No	No	53.4969	1763	-3.18156	-	-	-	-	-	-	p.V600E	Uncontacted
C-24	M	69	No	Yes	50.0268	1685	-0.458555	-	-	p.C39Y IVS5+2T>G	-	-	-	-	MSI-H	-	+	+	-	No mutation detected
C-25	F	64	No	No	51.0225	1670	-0.298616	-	-	-	-	p.W365*	-	p.V600E	MSI-L	+	+	±	+	MSH6 p.W413S	NR	US	NR	LP
C-26	F	70	No	No	52.248	1663	-2.97121	-	-	-	-	-	-	p.V600E	Uncontacted
C-27	F	72	No	No	49.3213	1661	N/A	-	-	-	-	-	-	p.V600E	Uncontacted
C-28	M	77	No	No	49.3817	1642	-2.14909	-	-	-	-	-	-	p.V600E	MSI-H	-	+	+	-	No mutation detected
C-29	F	36	Yes	Yes	48.4788	1627	-0.487032	-	-	-	LOH	LOH	-	-	MSI-H	+	-	±	+	MSH2 exon7 dup	NR	NR	DM	P
C-30	F	38	No	Yes	47.299	1588	N/A	-	-	p.T117M p.E519*	-	-	-	-	MSI-H	-	+	+	-	No mutation detected
C-31	M	75	No	No	50.4256	1566	-1.92796	-	-	-	-	-	-	p.V600E	Uncontacted
C-32	F	90	No	No	43.607	1471	-1.75855	-	-	-	-	-	-	p.V600E	Uncontacted
C-33	F	50	No	Yes	43.0527	1453	-2.06932	-	-	-	-	-	-	-	MSI-H	-	+	+	-	No mutation detected
C-34	F	83	No	No	44.1359	1440	-1.52051	-	-	-	-	-	-	p.V600E	Uncontacted
C-35	F	71	No	No	42.8343	1435	-1.86176	-	-	-	-	-	-	p.V600E	Uncontacted
C-36	F	89	No	No	43.8574	1425	N/A	-	-	-	-	-	-	p.V600E	Uncontacted
C-37	M	85	No	No	40.6793	1376	0.0784436	-	-	p.K618del	-	p.K854del	-	-	MSI-H	-	+	-	-	before target sequence
C-38	F	84	No	No	39.4885	1338	-2.13776	-	-	-	-	-	-	p.V600E	Uncontacted
C-39	F	76	No	No	39.6463	1327	-2.03546	-	-	-	-	-	-	p.V600E	Uncontacted
C-40	F	79	No	No	37.4559	1250	-2.07784	-	-	-	-	-	-	p.V600E	Uncontacted
C-41	M	66	No	No	36.4118	1194	-1.60685	-	-	-	-	-	-	p.V600E	Uncontacted
C-42	M	68	No	No	36.5181	1194	-1.46914	-	-	-	-	-	-	p.V600E	MSI-H	-	+	+	-	No mutation detected
C-43	M	78	No	No	36.1577	1172	-0.937697	-	-	-	-	-	-	-	MSI-H	-	+	+	-	No mutation detected
C-44	M	65	No	No	33.847	1125	-0.337208	-	-	-	LOH	LOH	-	-	MSI-H	+	-	-	+	MLH1 p.Q701K§	0.00683	LB	DM	LB
C-45	M	73	No	No	33.0917	1112	-0.699792	-	-	-	-	-	-	-	MSI-H	-	+	+	-	No mutation detected
C-46	F	68	No	No	33.5526	1056	-2.31764	-	-	-	-	p.P1309T	-	p.V600E	Uncontacted
C-47	F	54	No	Yes	33.8363	1000	0.343672	-	-	LOH	-	-	-	-	MSI-H	±	+	+	-	MLH1 p.A681T	NR	P	DM	LP
C-48	M	31	No	Yes	30.7789	996	N/A	-	-	LOH	-	-	-	-	MSI-H	-	+	+	-	MLH1 IVS6+2T>C	NR	NR	DM	P
C-49	M	62	No	No	32.0465	992	-1.77336	-	-	-	-	-	-	p.V600E	MSI-H	-	+	+	-	No mutation detected
C-50	M	78	No	No	30.2923	980	N/A	-	-	-	-	-	-	p.V600E	Uncontacted
C-51	M	51	No	Yes	26.3009	889	0.225468	-	-	-	-	-	-	-	MSI-H	-	+	+	-	MLH1 p.E23*	NR	P	DM	LP
C-52	M	65	No	No	25.3997	838	-2.13641	-	-	-	-	-	-	p.V600E	MSI-H	-	+	+	-	No mutation detected
C-53	F	74	No	Yes	24.3643	796	-0.351803	-	-	-	-	-	-	p.V600E	MSI-H	-	+	+	-	No mutation detected
C-54	F	63	No	No	24.8563	788	-1.77953	-	-	-	-	-	-	p.V600E	MSI-H	-	+	+	-	Disagree
C-55	M	76	No	No	20.9195	709	0.319596	-	-	-	-	-	-	-	Disagree
C-56	F	54	No	No	19.3067	445	N/A	-	-	-	-	-	-	-	MSS	+	+	+	+
C-57	F	64	No	No	16.3399	554	0.364888	-	-	-	-	-	-	-	MSS	+	+	+	+
C-58	F	83	No	No	10.1086	330	N/A	-	-	-	-	p.I927fs	-	-	MSS	+	+	+	+
S-1	M	57	No	No	16.0799	524	1.5	-	-	-	-	-	p.L420fs	-	MSI-H	+	+	±	-	PMS2 p.I18Sfs*34	NR	NR	DM	P
M: male, F: female, MSI-H: high frequency of microsatellite instability, MSI-L: microsatellite instability-low, MSS: microsatellite stable, DM: disease causing mutation, N/A: not available, P: pathogenic, LP: likely pathogenic, US: uncertain for significance, LB: likely benign, CI: conflicting interpretation of pathogenicity, NR: not reported. ¶The patient have uncontacted hospital for genetic co…
				5
