# Supplementary material for: Role of Tumor Mutation Burden Analysis in Detecting Lynch Syndrome in Precision Medicine: Analysis of 2,501 Japanese Cancer Patients
Source: Oxford University Press journal article supplement (doi:10.1158/1055-9965.epi-20-0694), 2020-10-12
Supplement: 10559965epi200694-sup-242916_3_supp_6569221_qgjk89.xlsx [file 10559965epi200694-sup-242916_3_supp_6569221_qgjk89.xlsx]

## Sheet:  Table A2
Supplementary Table 2. Genetic analysis results in cases of endometrial cancer with hTMB.
Case No.	Age (y.o)	History or family history of LS-related cancer	TMB (/Mb)	No. of somatic exonic mutation	Somatic MLH1 expression	Somatic mutation							MSI	IHC of MMR protein				Germline MMR
						POLE (exonuclease domain 86-427)	POLD1 (exonuclease domain 130-477)	MLH1	MSH2	MSH6	PMS2	BRAF		MLH1	MSH2	MSH6	PMS2	Detected variant	Allele frequency in control population	Pathogenicity of variant
																				ClinVar	HGMD	ACMG GL
E-1	56	No	749.248	24658	-1.00351	p.A189D p.F367V	p.R224H	-	-	p.G932V p.R1076C	p.I611M	R252Q	Disagree#
E-2	68	No	436.697	14371	1.35829	p.P286R	-	p.E230* p.L521I	p.E580* p.R680Q	-	-	D352N V276A	Disagree
E-3	35	No	392.528	13314	-1.75154	p.V411L	p.D249N	p.R100*	p.G759E	p.A465T p.R1095H	-	-	MSI-H	-	+	+	-	No mutation detected
E-4	55	Yes	278.529	9058	-1.16905	-	p.E318G	-	-	p.C615Y p.D943fs	-	-	MSS	+	+	-	+	MSH6 p.E376*	NR	NR	NR	P
E-5	42	No	152.59	5089	-1.07173	p.P286R	-	p.K118Q p.S420Y	p.M485I	p.E807K p.E1322*	-	-	MSS	+	+	+	+
E-6	49	No	77.3524	2557	N/A	p.P286R	-	-	-	p.D390N p.K1315Q	-	F247L	MSS	+	+	+	+
E-7	67	No	48.3684	1627	1.43167	p.V411L	-	-	-	-	-	-	MSS	+	+	+	+
E-8	73	Yes	45.2803	1501	1.11629	-	-	-	-	-	-	-	MSS	+	±	±	+	MSH6 p.W413S	NR	US	NR	LP
E-9	53	Yes	33.0542	1095	-1.01403	-	-	-	-	-	-	-	MSS	+	+	-	+	MSH6 p.F1088Sfs*2	NR	P	DM	P
E-10	56	No	33.0289	1048	1.21073	-	-	-	LOH†	LOH	-	-	MSI-H	+	-	-	+	MSH2 p.E290Dfs*2	NR	NR	DM	P
E-11	81	No	28.6553	958	-8.58754	-	-	-	-	-	-	-	MSI-H	-	+	+	-	No mutation detected
E-12	50	Yes	26.0009	877	-1.2992	-	-	-	-	p.R240*	-	-	MSI-H	+	+	-	+	No mutation detected
E-13	74	No	23.9288	726	-13.3052	-	-	-	-	-	-	-	MSI-H	-	+	+	-	No mutation detected
E-14	41	Yes	23.8343	806	-1.44147	-	-	-	-	-	-	-	MSI-H	+	-	-	+	MSH2 p.K235Ffs*9	NR	NR	NR	P
E-15	62	Yes	15.9789	522	-7.31018	-	-	-	-	-	-	-	MSI-H	-	+	+	-	No mutation detected
N/A: not available, P: pathogenic, US: uncertain for significance, NR: not reported, MSI-H: high frequency of microsatellite instability, MSS: microsatellite stable, DM: disease causing mutation. #The patient disagreed on MSI examination. -: negative for the finding. †Loss of heterozygosity (LOH) was analyzed using somatic copy number alteration analysis using sequencing and SNP array data (SAAS-…
